# Supplementary material
Source: Springer Nature journal article supplement (https://www.springermedizin.de/resource/supplementary/12967_2012_1361_MOESM3_ESM.pdf/9573444)
Supplement: MOESM3 [file 9573444]

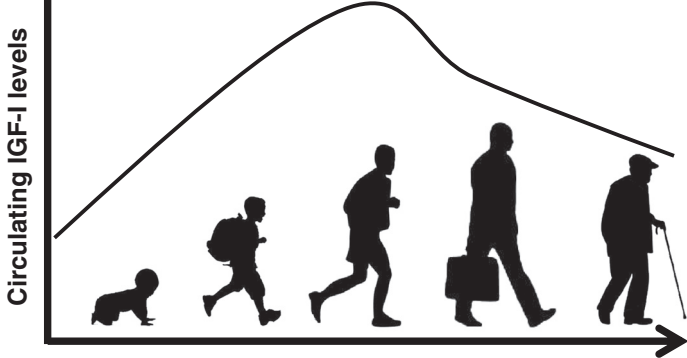

|                                            |                                                                  |                                                 |                                                                                                   |                                                              | References                                                                                                   |
|--------------------------------------------|------------------------------------------------------------------|-------------------------------------------------|---------------------------------------------------------------------------------------------------|--------------------------------------------------------------|--------------------------------------------------------------------------------------------------------------|
| Lifelong physiological properties of IGF-I | Growth<br>Neurogenesis and synaptogenesis<br>Genital development | Bone metabolism<br>Anabolizing<br>Proliferative | Lipid and glucose metabolisms<br>Antioxidant and antiinflammatory<br>Hepato- and cardioprotection | Neuroprotection<br>Antiapoptotic<br>Mitochondrial protection | 15,16, 22, 23, 26-28, 55-88,101-108, 121-133, 156-175, 169, 206, 225-233, 270-275, 290, 295-306, 357-359,398 |
| Processes involved in longevity            | Genetic stability                                                | Stress resistance                               | Metabolic control                                                                                 | Telomere shortening                                          | 238                                                                                                          |

  
**IGF-I**
